# Supplementary material
Source: PubMed Central journal article supplement (PMC8201429)
Supplement: NIHMS1698054-supplement-Supplementary_Table_1.pdf [file NIHMS1698054-supplement-Supplementary_Table_1.pdf]

**Supplementary Table 1: Logistic Regression of Donor Chimerism and ATG Use**

| <b>Outcome</b>  | <b>Predictor</b>               | <b>OR (95% CI)</b> | <b><i>p</i>-value</b> |
|-----------------|--------------------------------|--------------------|-----------------------|
| CD3 day<br>+30  | (Intercept)                    |                    | 0.269                 |
|                 | ATG (Yes vs. No)               | 0.37 (0.02-3.9)    | 0.444                 |
|                 | RIC regimen (FBM vs. BuFlu)    | 46.8 (5.5-1125)    | 0.002                 |
|                 | RIC regimen (FluMel vs. BuFlu) | 43 (4.1-1475)      | 0.007                 |
| CD3 day<br>+100 | (Intercept)                    |                    | 0.065                 |
|                 | ATG (Yes vs. No)               | 2.6 (0.20-67.1)    | 0.484                 |
|                 | RIC regimen (FBM vs. BuFlu)    | 45.6 (4.4-1252)    | 0.005                 |
|                 | RIC regimen (FluMel vs. BuFlu) | 32.4 (3.0-1110)    | 0.014                 |

**Supplementary Table 2: Logistic Regression of GVHD and ATG use**

| <b>Table: Logistic Regression of GVHD Measures and ATG Use Adjusting for RIC Regimen</b> |                                |                    |                       |
|------------------------------------------------------------------------------------------|--------------------------------|--------------------|-----------------------|
| <b>Outcome</b>                                                                           | <b>Predictor</b>               | <b>OR (95% CI)</b> | <b><i>p</i>-value</b> |
| Acute GVHD<br>All Grades                                                                 | (Intercept)                    |                    | 0.438                 |
|                                                                                          | ATG (Yes vs. No)               | 2.1 (.51-9.8)      | 0.315                 |
|                                                                                          | RIC regimen (FBM vs. BuFlu)    | 3.6 (.73-19)       | 0.119                 |
|                                                                                          | RIC regimen (FluMel vs. BuFlu) | 4.6 (1.1-21.7)     | 0.041                 |
| Acute GVHD<br>Grades 2-4                                                                 | (Intercept)                    |                    | 0.382                 |
|                                                                                          | ATG (Yes vs. No)               | 2.4 (.62-10.3)     | 0.225                 |
|                                                                                          | RIC regimen (FBM vs. BuFlu)    | 1.6 (.36-7.1)      | 0.530                 |
|                                                                                          | RIC regimen (FluMel vs. BuFlu) | 3.0 (.77-12.7)     | 0.126                 |
| Acute GVHD<br>Grades 3-4                                                                 | (Intercept)                    |                    | 0.555                 |
|                                                                                          | ATG (Yes vs. No)               | 0.56 (.14-2.1)     | 0.396                 |
|                                                                                          | RIC regimen (FBM vs. BuFlu)    | 0.92 (.20-4.5)     | 0.912                 |
|                                                                                          | RIC regimen (FluMel vs. BuFlu) | 1.4 (.36-5.4)      | 0.640                 |
| Chronic<br>GVHD                                                                          | (Intercept)                    |                    | 0.714                 |
|                                                                                          | ATG (Yes vs. No)               | 0.41 (.10-1.5)     | 0.187                 |
|                                                                                          | RIC regimen (FBM vs. BuFlu)    | 1.7 (.37-8.3)      | 0.514                 |
|                                                                                          | RIC regimen (FluMel vs. BuFlu) | 2.3 (.61-9.3)      | 0.223                 |

**Supplementary Table 3:** Restricted Mean Survival Time (in Years) by RIC Regimen

| <b>RIC Regimen</b> | <b>Mean Survival (95% CI)</b> | <b><i>p</i>-value</b> |
|--------------------|-------------------------------|-----------------------|
| FBM                | 1.56 (1.3-1.8)                | 0.406                 |
| FluMel/BuFlu       | 1.40 (1.2-1.6)                |                       |
| FluMel             | 1.34 (.99-1.7)                | 0.383                 |
| FBM/BuFlu          | 1.52 (1.3-1.7)                |                       |

**Supplementary Table 4:** Probability of Survival at 2 Years Post Transplant by RIC Regimen

| <b>RIC Regimen</b> | <b>Probability<br/>(95% CI)</b> |
|--------------------|---------------------------------|
| BuFlu              | 0.59 (0.40-0.88)                |
| FBM                | 0.67 (0.50-0.91)                |
| FluMel             | 0.59 (0.42-0.84)                |

**Supplementary Table 5:** Overall Survival Analysis Model by RIC regimens adjusted for possible confounding factors

| <b>Predictor</b>                 | <b>HR<br/>(95% CI for HR)</b> | <b><i>p</i>-value</b> |
|----------------------------------|-------------------------------|-----------------------|
| RIC regimen: FBM vs. BuFlu       | 1.2 (0.33-4.4)                | 0.779                 |
| RIC regimen: FluMel vs. BuFlu    | 1.1 (0.40-3.2)                | 0.800                 |
| ATG: Yes vs. No                  | 0.59 (0.20-1.7)               | 0.333                 |
| JAK2 mutation: Yes vs. No        | 1.9 (0.66-5.2)                | 0.238                 |
| DIPSS plus: High vs, Int-1/Int-2 | 1.5 (0.64-3.7)                | 0.333                 |
| RIC regimen: FBM vs. BuFlu       | 1.2 (0.33-4.4)                | 0.779                 |
